# Supplementary material
Source: HighWire-hosted journal article supplement (https://bmjopen.bmj.com/content/11/2/e042129)
Supplement: inline-supplementary-material-1 [file inline-supplementary-material-1.pdf]

**Supplementary Table 1 Search strategy used in PubMed database**

| Number | Search items                                                                                                                                                                                                                                  |
|--------|-----------------------------------------------------------------------------------------------------------------------------------------------------------------------------------------------------------------------------------------------|
| #1     | "elasticity imaging techniques"[MeSH Terms] OR ("elasticity"[All Fields] AND "imaging"[All Fields] AND "techniques"[All Fields]) OR "elasticity imaging techniques"[All Fields] OR "elastographies"[All Fields] OR "elastography"[All Fields] |
| #2     | ultrasonography [MeSH terms]                                                                                                                                                                                                                  |
| #3     | #1 OR #2                                                                                                                                                                                                                                      |
| #4     | "biliary atresia"[MeSH Terms] OR "biliary atresia"[All Fields]                                                                                                                                                                                |
| #5     | portoenterostomy, hepatic [MeSH terms]                                                                                                                                                                                                        |
| #6     | Kasai procedure [All Fields]                                                                                                                                                                                                                  |
| #7     | hepatopartoenterostomy [All Fields]                                                                                                                                                                                                           |
| #8     | #5 OR #6 OR #7                                                                                                                                                                                                                                |
| #9     | #3 AND #4 AND #8                                                                                                                                                                                                                              |

There are no other limits or filters in this search strategy.
